# Supplementary material for: Preparation of Ru/N-doped carbon catalysts by induction of different nitrogen source precursors for the hydroprocessing of lignin oil
Source: Royal Society of Chemistry journal article supplement (doi:10.1039/d3ra01866k), 2023-01-01
Supplement: d3ra01866k1.pdf [file d3ra01866k1.pdf]

## Supporting Information

### **One-pot preparation of Ru/ N-Doped Carbon catalyst for the hydroprocessing of lignin oil**

Yudan Zhong, Yulong Ma, \* Yonggang Sun, \* Yuanyuan Li, Liqiong Wang, Feng Lin, Yingbo

Zhu

State Key Laboratory of High-efficiency Coal Utilization and Green Chemical Engineering, College of Chemistry

and Chemical Engineering, Ningxia University, Yinchuan, China.

Corresponding author:

Yu-long Ma

State Key Laboratory of High-efficiency Utilization of Coal and Green Chemical Engineering, College of Chemistry and Chemical Engineering, Ningxia University  
Helanshan Rd. 539, Yinchuan 750021, China

E-mail: yulongma796@sohu.com (Yu-long Ma)

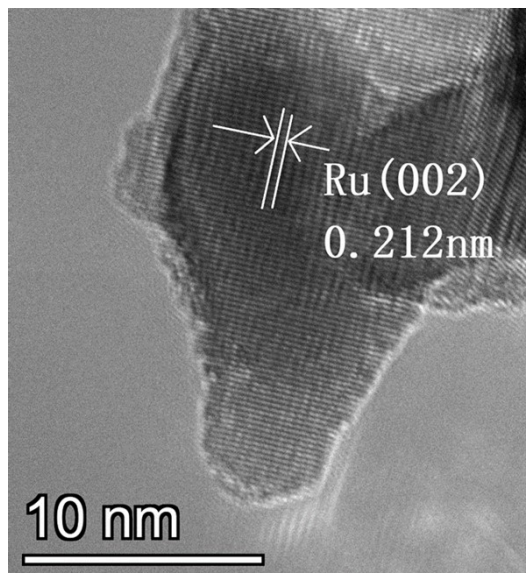

Figure S1. TEM images of Ru/NC-M.

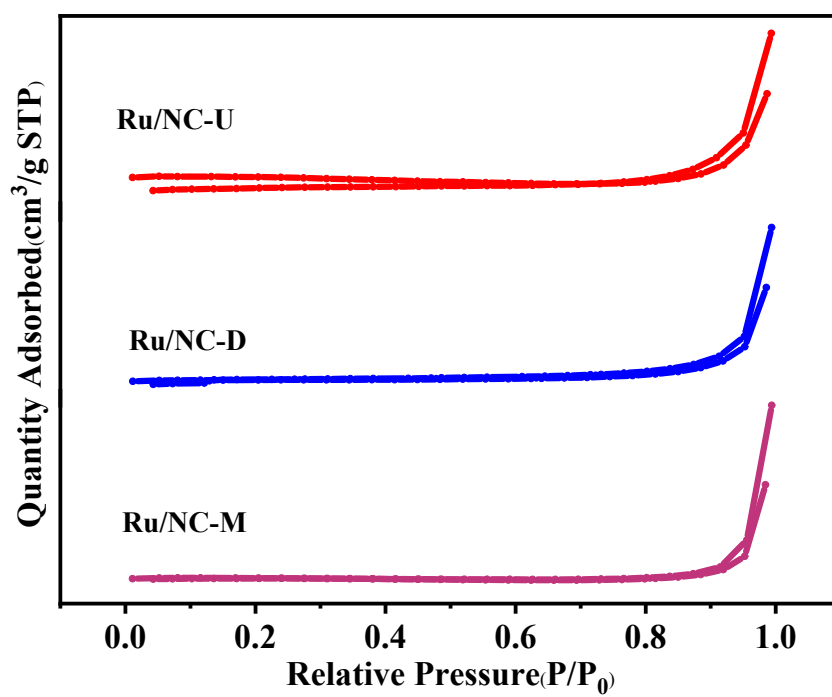

Figure S2. N<sub>2</sub> adsorption isotherm.

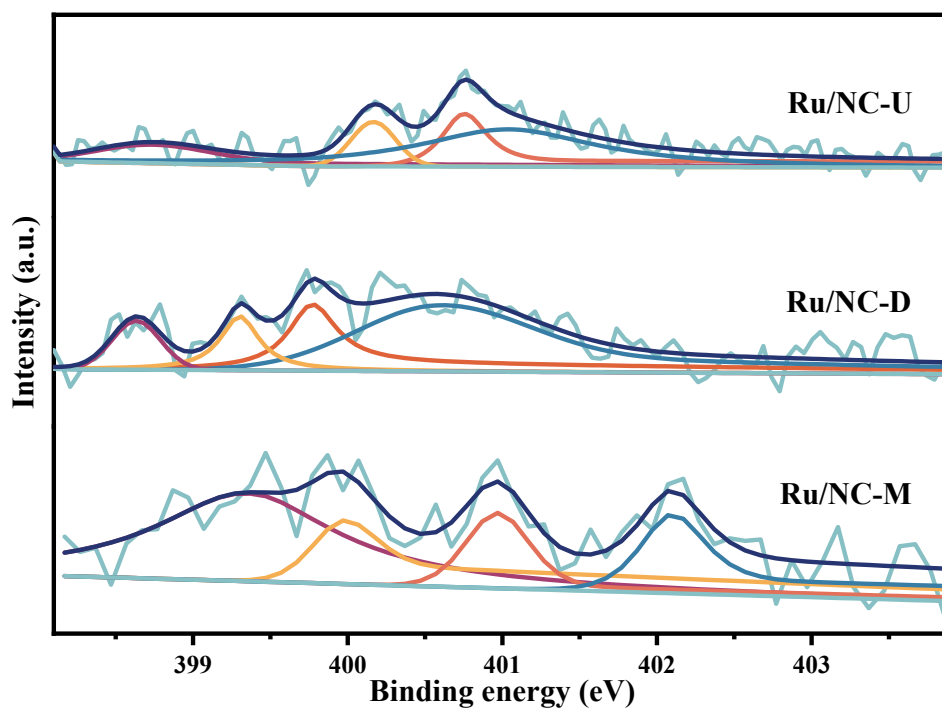

Figure S3. XPS spectra of catalysts N 1s.

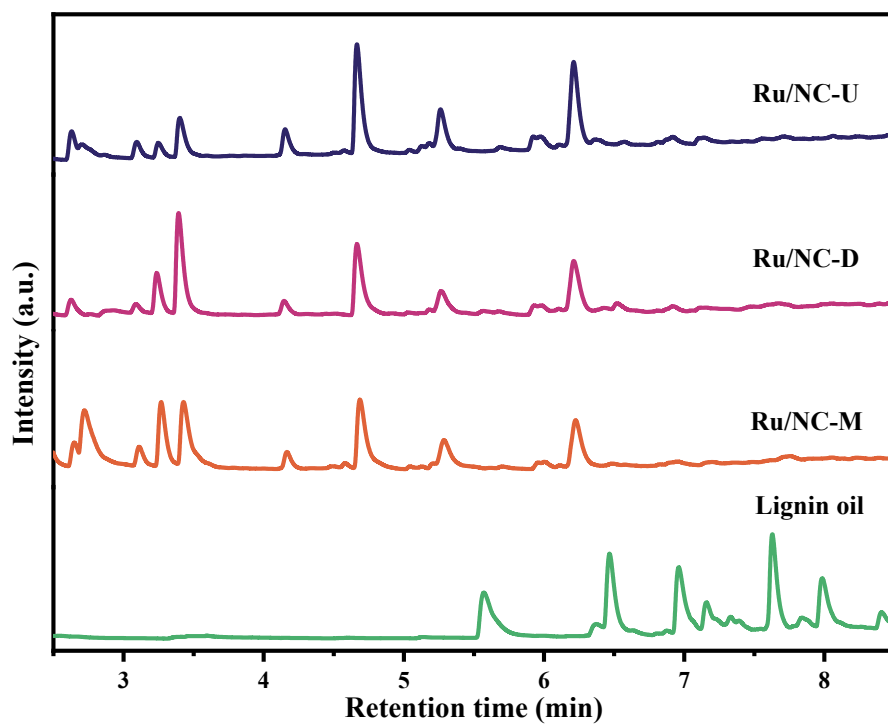

Figure S4. Hydrogenolysis of lignin oil over different catalysts

Reaction conditions: 100 mg lignin oil, 50 mg catalyst, 30 mL isopropanol, 240 °C,

1MPa H<sub>2</sub>, 7 h, 800 rpm

Table S1. ICP-MS analysis for the Ru/ N-doped carbon catalysts.

| Catalysts | ICP-MS analysis(wt%) |
|-----------|----------------------|
|           | Ru                   |
| Ru/NC-U   | 6.40                 |
| Ru/NC-D   | 7.50                 |
| Ru/NC-M   | 3.24                 |

Table S2. BET surface area, Pore volume and Pore diameter of catalysts.

| Catalysts | $S_{\text{BET}}$<br>( $\text{m}^2\text{g}^{-1}$ ) | Pore volume<br>( $\text{cm}^3\text{g}^{-1}$ ) | Pore diameter<br>(nm) |
|-----------|---------------------------------------------------|-----------------------------------------------|-----------------------|
| Ru/NC-U   | 2.20                                              | 0.007                                         | 30.65                 |
| Ru/NC-D   | 2.60                                              | 0.02                                          | 34.96                 |
| Ru/NC-M   | 8.62                                              | 0.019                                         | 40.84                 |

Table S3. The various Ru species content of the Ru/N-doped Carbon Catalysts.

| Catalyst | Ru <sup>0</sup> | Ru <sup>n+</sup> |
|----------|-----------------|------------------|
| Ru/NC-U  | 65.50           | 34.50            |
| Ru/NC-D  | 59.14           | 40.86            |
| Ru/NC-M  | 71.94           | 28.06            |

Table S4. The data of Pyridine-IR

| Catalyst | Acid sites( $\mu\text{molg}^{-1}$ ) |          |       |       |
|----------|-------------------------------------|----------|-------|-------|
|          | Lewis                               | Bronsted | Total | L/B   |
| Ru/NC-U  | 33.09                               | 2.19     | 35.28 | 15.11 |
| Ru/NC-D  | 39.24                               | 2.53     | 41.77 | 15.51 |
| Ru/NC-M  | 65.15                               | 3.57     | 68.72 | 18.25 |

Table S5. The comparison of catalytic performance between the Ru/NC-M and previous reported catalysts.

| Catalyst                                                      | Loading of metals | Reaction conditions                                         | Conversion(%) | Ref.      |
|---------------------------------------------------------------|-------------------|-------------------------------------------------------------|---------------|-----------|
| Pt-Ni/SO <sub>4</sub> <sup>2-</sup> /ZrO <sub>2</sub> /SBA-15 | 2wt% Pt 10wt% Ni  | 260°C, 5MPaH <sub>2</sub>                                   | 62.37         | 1         |
| Pt/C                                                          | 5wt%              | 300°C, 1MPaH <sub>2</sub>                                   | 87            | 2         |
| Pt/NC                                                         | 5wt%              | 400°C, H <sub>2</sub> : 80 sccm, N <sub>2</sub> : 19.5 sccm | 100           | 3         |
| Ru/15WZr(syn)                                                 | 5wt%              | 270°C, 4MPaH <sub>2</sub>                                   | 98.5          | 4         |
| Ru/HZSM-5                                                     | 5wt%              | 240°C, 2MPaH <sub>2</sub>                                   | 63            | 5         |
| Ru/NC-M                                                       | 3.2wt%            | 240°C, 1MPaH <sub>2</sub>                                   | 100           | This work |

#### References:

1. Chen W, Luo Z and Yu C. Fuel processing technology, 2014, **126**, 420-428.
2. Gao D, Schweitzer C and Hwang H T. Industrial & Engineering Chemistry Research, 2014, **53**, 18658-18667.
3. Liu C, Zhou C and Wang Y. Proceedings of the Combustion Institute, 2021, **38**, 4345-4353.
4. Dwiatmoko A A, Kim I and Zhou L. Applied Catalysis A: General, 2017, **543**, 10-16.
5. Luo Z, Zheng Z and Wang Y. Green Chemistry, 2016, **18**, 5845-5858.



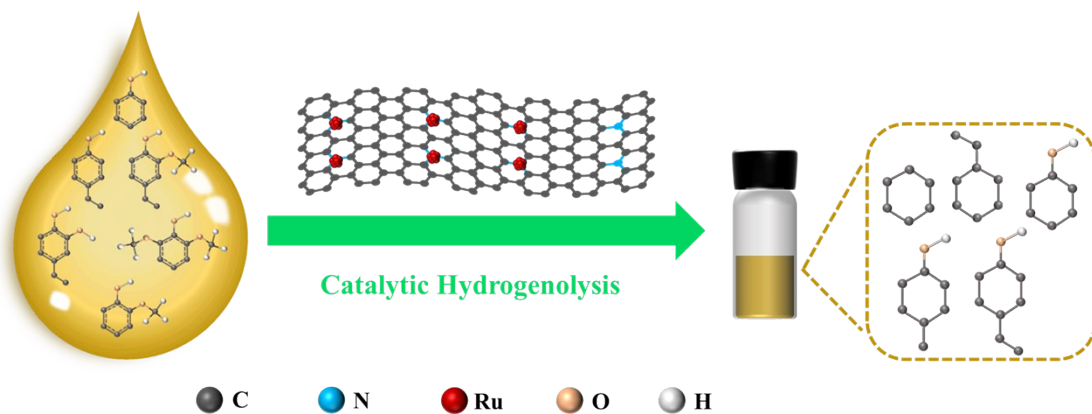

Figure S5. Graphical abstract.
